# Supplementary material
Source: MDPI journal article supplement (https://www.mdpi.com/1424-8247/16/12/1669)
Supplement: s1 [file s1]

# ***In vitro* screening of antimicrobial and anti-coagulant activities, ADME profiling, and molecular docking study of *Citrus limon* L. and *Citrus paradisi* L. cold-pressed volatile oils**

**Assia Hamdi<sup>1</sup>, Mabrouk Horchani<sup>2</sup>, Hichem Ben Jannet<sup>2</sup>, Mejdi Snoussi<sup>3,4</sup>, Emira Noumi<sup>3,4</sup>, Nouha Bouali<sup>3,4</sup>, Adel Kadri<sup>5,6</sup>, Flavio Polito<sup>7</sup>, Vincenzo De Feo<sup>7\*</sup>, Hayet Edziri<sup>8</sup>**

<sup>1</sup>Laboratory of Chemical, Pharmaceutical and Pharmacological Development of Drugs, Faculty of Pharmacy, University of Monastir, Tunisia; hamdiessia@gmail.com (A.H.)

<sup>2</sup>Laboratory of Heterocyclic Chemistry, Natural Products and Reactivity, Team: Medicinal Chemistry and Natural Products (LR11ES39), Department of Chemistry, Faculty of Science of Monastir, University of Monastir, Avenue of Environment, 5019, Monastir, Tunisia; horchani.mabrouk@gmail.com (M.H.); hichem.bjannet@gmail.com (H.B.J.)

<sup>3</sup>Department of Biology, College of Science, University of Ha'il, P.O. Box 2440, Hail 2440, Saudi Arabia; nouhabouali82@gmail.com (N.B.); eb.noumi@uoh.edu.sa (E.N.); m.snoussi@uoh.edu.sa (M.S.)

<sup>4</sup>Medical and Diagnostic Research Centre, University of Ha'il, Hail 55473, Saudi Arabia

<sup>5</sup>College of Science and Arts in Baljurashi, Al Baha University, P.O. Box (1988), Al Baha, Saudi Arabia. lukadel@yahoo.fr (A.K.)

<sup>6</sup>Laboratory of Plant Biotechnology Applied to Crop Improvement, Faculty of Sciences of Sfax, University of Sfax, B.P. 11713000, Sfax, Tunisia

<sup>7</sup>Department of Pharmacy, University of Salerno, Via Giovanni Paolo II, 132, Fisciano, 84084 Salerno, Italy; fpolito@unisa.it (F.P.); defeo@unisa.it (V.D.F.)

<sup>8</sup>Laboratory of Transmissible Diseases and Biologically Active Substances, Faculty of Pharmacy, 5000, Monastir, Tunisia; jaziri\_hayet@yahoo.fr (H.J.)

\*Correspondence: defeo@unisa.it (V.D.F.)

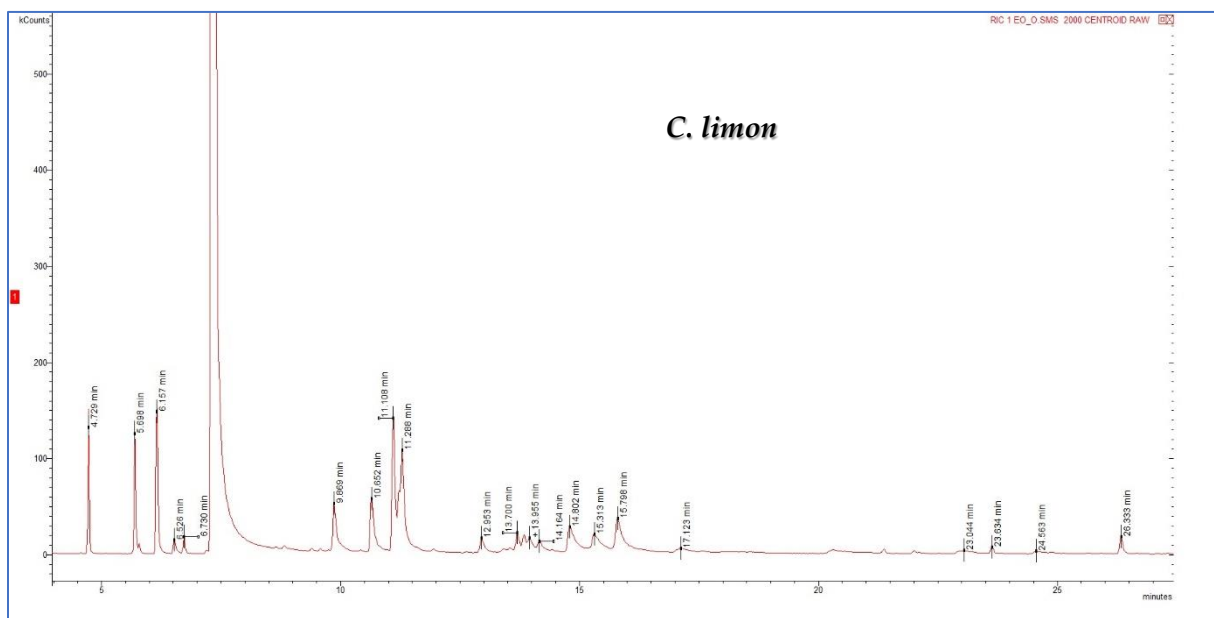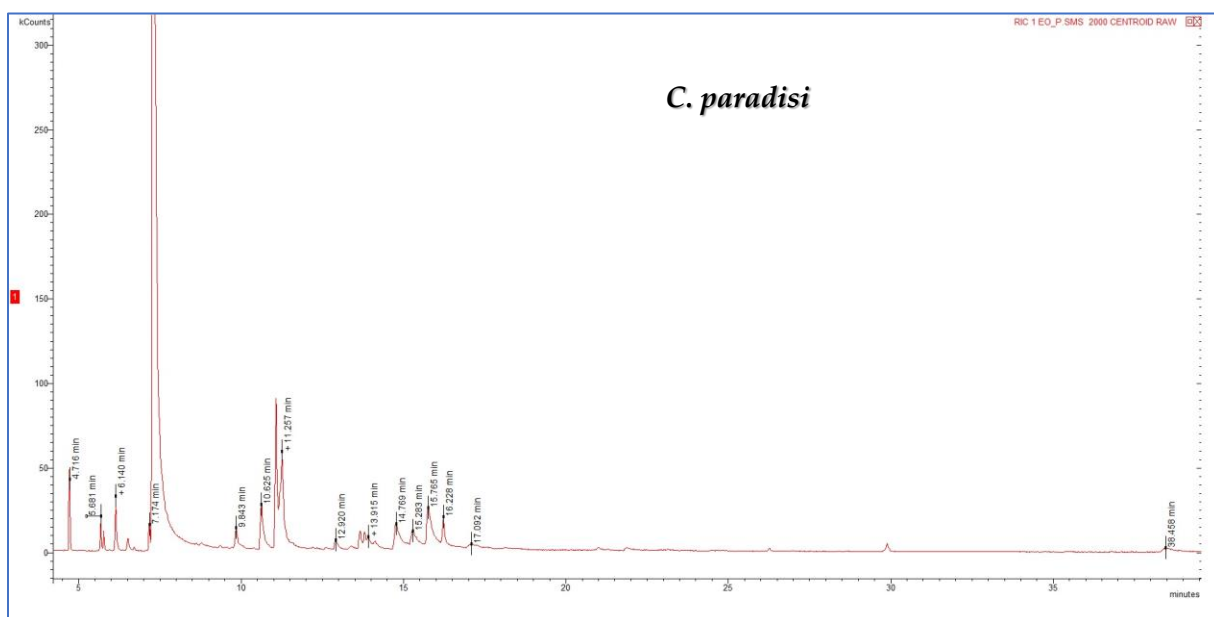

**Supplementary material SM1.** Chromatograms obtained for both *C. limon* and *C. paradisi* obtained by using by SPME/MS technique.
